# Supplementary material for: Subsystem density-functional theory for interacting open-shell systems: spin densities and magnetic exchange couplings
Source: Royal Society of Chemistry journal article supplement (doi:10.1039/d0fd00063a), 2020-01-01
Supplement: d0fd00063a1.pdf [file d0fd00063a1.pdf]

# Subsystem Density-Functional Theory for Interacting Open-Shell Systems: Spin Densities and Magnetic Exchange Couplings – Supporting Information–

Anja Massolle and Johannes Neugebauer<sup>1</sup>

Theoretische Organische Chemie, Organisch-Chemisches Institut  
and Center for Multiscale Theory and Computation,  
Westfälische Wilhelms-Universität Münster  
Corrensstraße 36, 48149 Münster, Germany

Date: May 15, 2020

---

<sup>1</sup>email: [j.neugebauer@uni-muenster.de](mailto:j.neugebauer@uni-muenster.de)

# S1 Verdazyl Dimer

## S1.1 Potential Energy Surface of the Verdazyl Dimer

Fig. S-1 shows the potential energy surface for the BS, triplet and closed-shell state calculated with KS-DFT and sDFT. The equilibrium distance between the monomers is at about 3.0 Å for the triplet and BS spin state with sDFT and at about 3.6 Å with broken-symmetry KS-DFT. The closed-shell state calculated with KS-DFT has an equilibrium distance of about 3.0 Å.

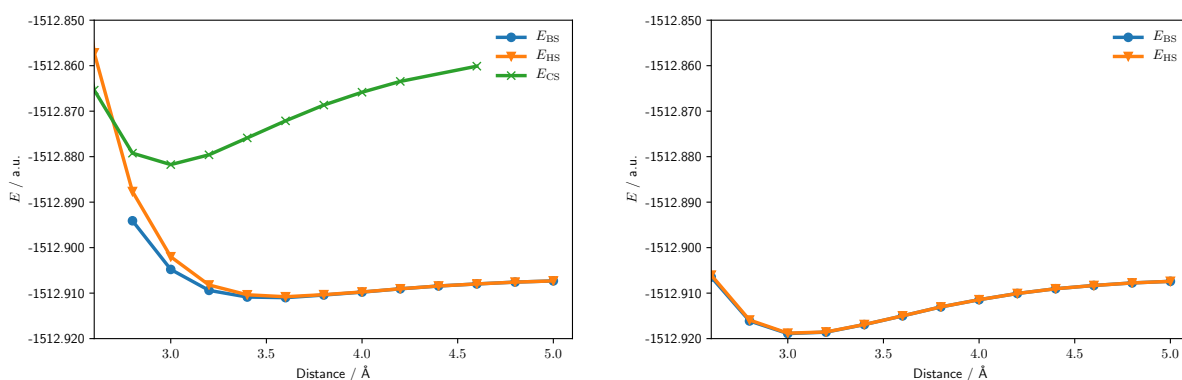

**Figure S-1:** Potential energy surface for the BS, triplet (HS) and closed-shell (CS) state for the verdazyl dimer shown in Fig. 1 in the Manuscript, calculated with BS/KS-DFT (PBE0) (left) and sDFT (FAT PW91k PBE0/PBE in supersystem basis) (right).

## S1.2 Spin Density of the Verdazyl Dimer

Fig. S-2 shows the HS spin density calculated with KS-DFT for selected distances.

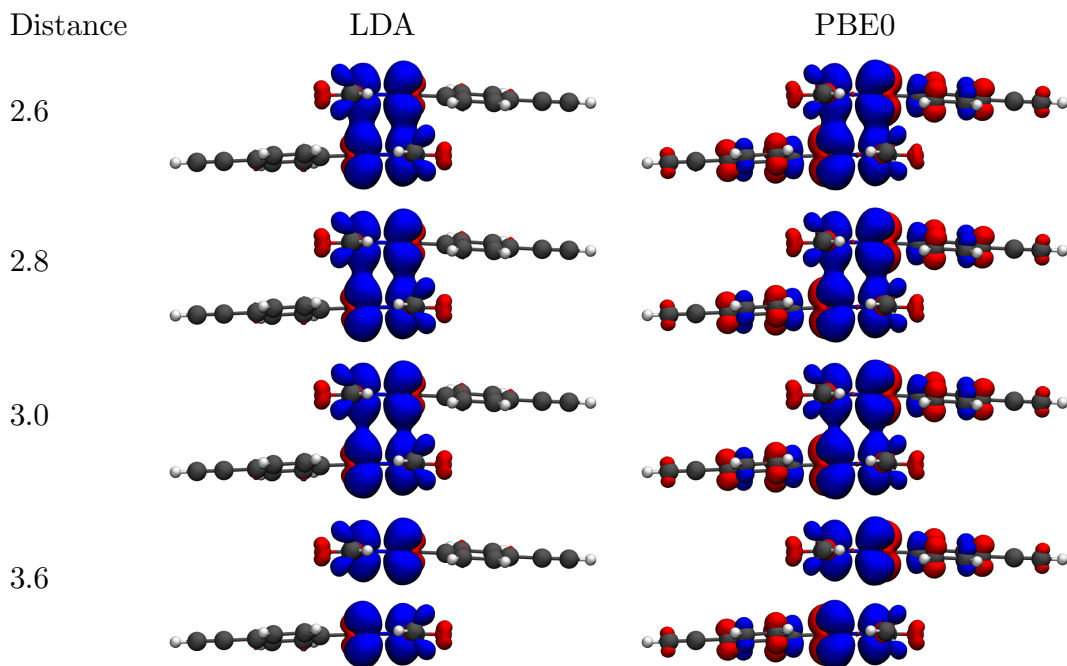

**Figure S-2:** KS-DFT spin densities of the HS state of the verdazyl dimer shown in Fig. 1 in the manuscript for selected distances. An isovalue of 0.001 a.u. was applied.

## S2 TTTA Crystal Structure

Fig. S-3 shows the spin density of the HS state ( $S = 13$ ) for the cut out of the crystal structure shown in Fig. 10 in the manuscript. On the right side the spin density as a sum-of-isolated monomers densities and on the left side the converged sDFT density are shown. The spin density difference between these is shown in Fig. S-4. The spin density of the  $S=0$  BS state as a sum-of-isolated monomers contributions (left) and the converged sDFT spin-density (right) is shown in Fig. S-5. Fig. S-6 shows the corresponding spin density difference. For the  $S=2$  BS state the sDFT spin density is shown in Fig. S-7.

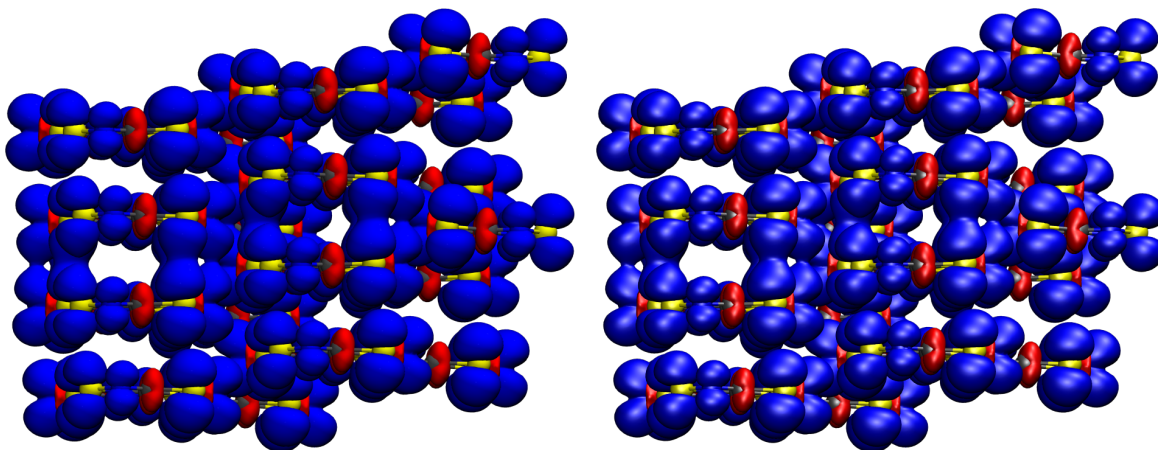

**Figure S-3:** Spin density of the high-spin state of the crystal structure cut-out of TTTA. Left: The spin-density of the isolated subsystems, calculated with PBE. Right: sDFT PBE/PBE/PW91k spin-density. An isovalue of 0.001 a.u. was applied.

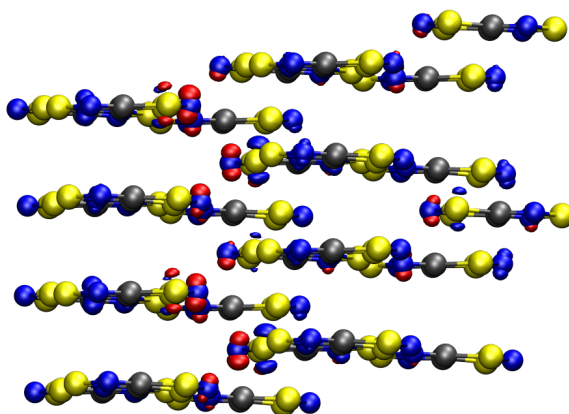

**Figure S-4:** Spin density difference between sDFT and the isolated monomer densities of the crystal structure cut-out of TTTA for the HS state. An isovalue of 0.001 a.u. was applied.

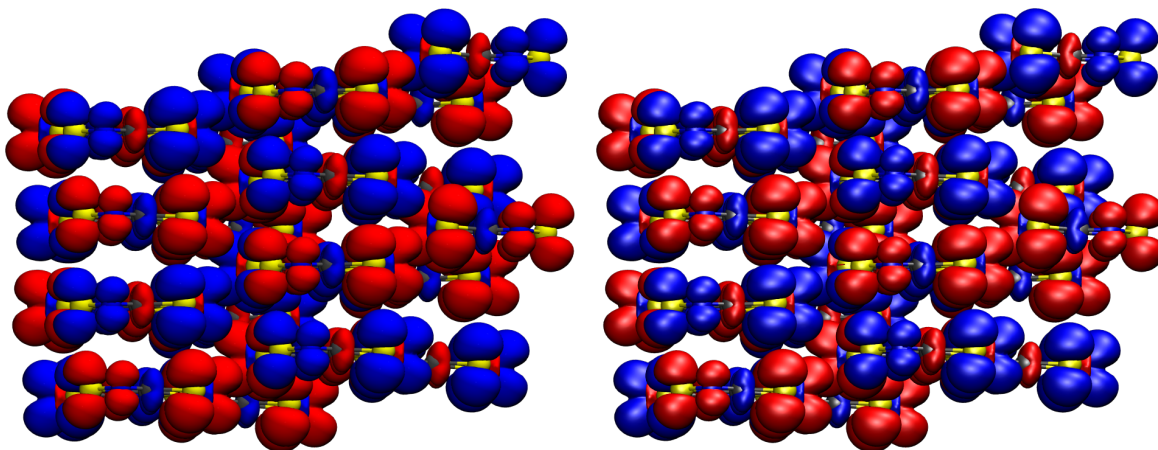

**Figure S-5:** Spin density of an BS state ( $S = 0$ ) of the crystal structure cut-out of TTTA. Left: The spin-density of the isolated subsystems, calculated with PBE. Right: sDFT PBE/PBE/PW91k spin-density. An isovalue of 0.001 a.u. was applied.

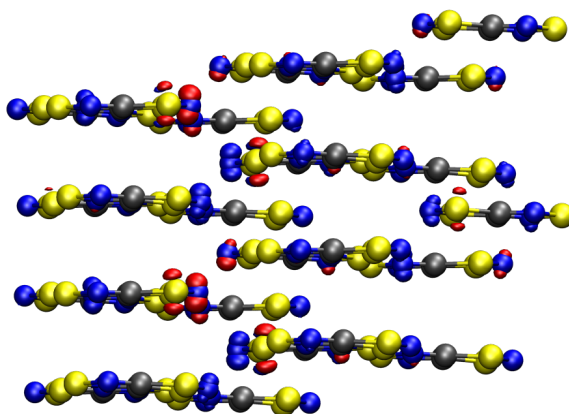

**Figure S-6:** Spin density difference between sDFT and the isolated monomer densities for the high-spin state. An isovalue of 0.001 a.u. was applied.

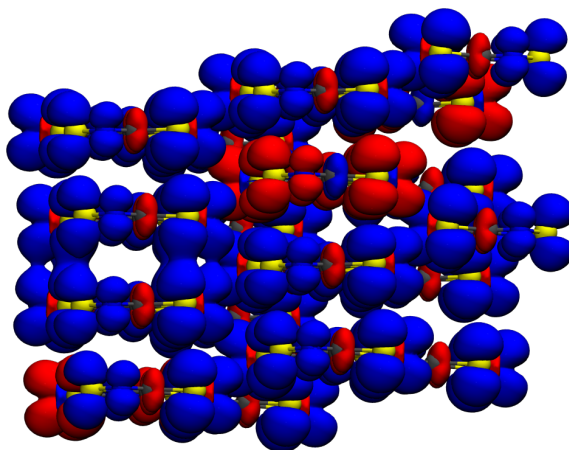

**Figure S-7:** Subsystem DFT (PBE/PBE/PW91k) spin density of an BS state ( $S = 2$ ) for the crystal structure cut out. An isovalue of 0.001 a.u. was applied.

### S3 Convergence of $\langle \hat{S}^2 \rangle$

The progression of the  $\langle \hat{S}^2 \rangle$  value with respect to the FAT cycles of the PBE/PBE Huzinaga calculation for the SAXPOW01 TTTA dimer is shown in Fig. S-8. A slow convergence from an initial  $\langle \hat{S}^2 \rangle$  value of 0.915 to 0 can be seen.

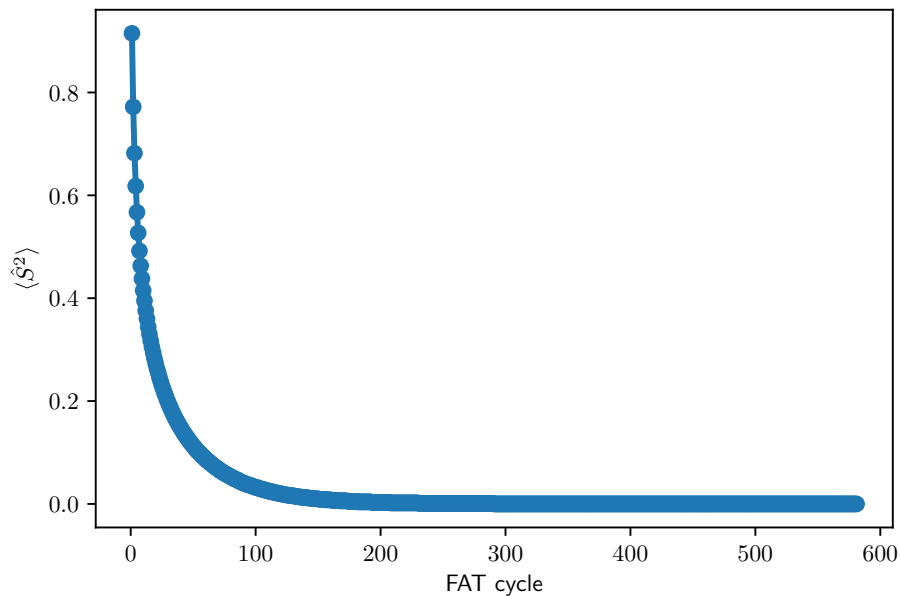

**Figure S-8:** The  $\langle \hat{S}^2 \rangle$  value with respect to the FAT cycle for a Huzinaga PBE/PBE calculation in supersystem basis for the SAXPOW01 TTTA dimer.

## S4 Magnetic Exchange Coupling Constants

In the following all calculated  $\langle \hat{S}^2 \rangle_{\text{BS}}$  and magnetic exchange coupling constants for the TTTA dimers SAXPOW01, SAXPOW05 and SAXPOW06 are shown.

## S4.1 SAXPOW05

**Table S-I:** Magnetic exchange coupling constants calculated for the SAXPOW05 dimer with broken-symmetry KS-DFT and sDFT for different XC-/(non-additive-XC-)functionals.

| NAKE                    | LDA(/LDA)            | PBE(/PBE)            | PBE0(/PBE)           |
|-------------------------|----------------------|----------------------|----------------------|
|                         | $J / \text{cm}^{-1}$ | $J / \text{cm}^{-1}$ | $J / \text{cm}^{-1}$ |
| KS-DFT                  |                      |                      |                      |
|                         | -328                 | -236                 | -93                  |
| sDFT, Subsystem basis   |                      |                      |                      |
| PW91k                   | -6                   | -10                  | -9                   |
| sDFT, Supersystem basis |                      |                      |                      |
| PW91k                   | -43                  | -37                  | -24                  |

**Table S-II:**  $\langle S^2 \rangle_{\text{BS}}$  values calculated for the SAXPOW05 dimer with broken-symmetry KS-DFT and sDFT for different different XC-/(non-additive-XC-)functionals.

| NAKE                    | LDA(/LDA) | PBE(/PBE) | PBE0(/PBE) |
|-------------------------|-----------|-----------|------------|
| KS-DFT                  |           |           |            |
|                         | 1.003     | 1.070     | 1.208      |
| sDFT, Subsystem basis   |           |           |            |
| PW91k                   | 1.094     | 1.120     | 1.217      |
| sDFT, Supersystem basis |           |           |            |
| PW91k                   | 1.084     | 1.113     | 1.213      |



**Table S-III:** Magnetic exchange coupling constants calculated for the SAXPOW05 dimer from sDFT densities using the accurate  $T_s$  from supersystem orbitals.

|                   | LDA                  | PBE                  | PBE0                 |
|-------------------|----------------------|----------------------|----------------------|
|                   | $J / \text{cm}^{-1}$ | $J / \text{cm}^{-1}$ | $J / \text{cm}^{-1}$ |
| Subsystem basis   |                      |                      |                      |
| LDA/LDA/PW91k     | -131                 | -135                 | -123                 |
| PBE/PBE/PW91k     | -113                 | -117                 | -104                 |
| PBE0/PBE/PW91k    | -83                  | -86                  | -75                  |
| Supersystem basis |                      |                      |                      |
| LDA/LDA/PW91k     | -211                 | -202                 | -140                 |
| PBE/PBE/PW91k     | -172                 | -168                 | -123                 |
| PBE0/PBE/PW91k    | -112                 | -111                 | -81                  |

**Table S-IV:** Magnetic exchange coupling constants calculated for the SAXPOW05 dimer from the sum-of isolated monomer (spin) densities using the accurate  $T_s$  from supersystem orbitals.

|                   | LDA                  | PBE                  | PBE0                 |
|-------------------|----------------------|----------------------|----------------------|
|                   | $J / \text{cm}^{-1}$ | $J / \text{cm}^{-1}$ | $J / \text{cm}^{-1}$ |
| Subsystem basis   |                      |                      |                      |
| Isolated, LDA     | -126                 | -130                 | -119                 |
| Isolated, PBE     | -109                 | -114                 | -103                 |
| Isolated, PBE0    | -78                  | -82                  | -73                  |
| Supersystem basis |                      |                      |                      |
| Isolated, LDA     | -153                 | -158                 | -142                 |
| Isolated, PBE     | -134                 | -138                 | -123                 |
| Isolated, PBE0    | -89                  | -93                  | -82                  |

## S4.2 SAXPOW06

**Table S-V:** Magnetic exchange coupling constants calculated for the SAXPOW06 dimer with broken-symmetry KS-DFT and sDFT for different XC-/(non-additive-XC-)functionals.

| NAKE                    | LDA(/LDA)            | PBE(/PBE)            | PBE0(/PBE)           |
|-------------------------|----------------------|----------------------|----------------------|
|                         | $J / \text{cm}^{-1}$ | $J / \text{cm}^{-1}$ | $J / \text{cm}^{-1}$ |
| KS-DFT                  |                      |                      |                      |
|                         | -33                  | -23                  | -7                   |
| sDFT, Subsystem basis   |                      |                      |                      |
| PW91k                   | 0                    | 0                    | 0                    |
| sDFT, Supersystem basis |                      |                      |                      |
| PW91k                   | 1                    | 1                    | 1                    |

**Table S-VI:**  $\langle S^2 \rangle_{\text{BS}}$  values calculated for the SAXPOW06 dimer with broken-symmetry KS-DFT and sDFT for different XC-/(non-additive-XC-)functionals.

| NAKE                    | LDA(/LDA) | PBE(/PBE) | PBE0(/PBE) |
|-------------------------|-----------|-----------|------------|
| KS-DFT                  |           |           |            |
| KS-DFT                  | 1.097     | 1.127     | 1.235      |
| sDFT, Subsystem basis   |           |           |            |
| PW91k                   | 1.102     | 1.129     | 1.231      |
| sDFT, Supersystem basis |           |           |            |
| PW91k                   | 1.102     | 1.129     | 1.233      |

**Table S-VII:** Magnetic exchange coupling constants calculated for the SAXPOW06 dimer from sDFT densities using the accurate  $T_s$  from supersystem orbitals.

|                   | LDA                  | PBE                  | PBE0                 |
|-------------------|----------------------|----------------------|----------------------|
|                   | $J / \text{cm}^{-1}$ | $J / \text{cm}^{-1}$ | $J / \text{cm}^{-1}$ |
| Subsystem basis   |                      |                      |                      |
| LDA/LDA/PW91k     | -22                  | -23                  | -9                   |
| PBE/PBE/PW91k     | -17                  | -18                  | -7                   |
| PBE0/PBE/PW91k    | -13                  | -13                  | -7                   |
| Supersystem basis |                      |                      |                      |
| LDA/LDA/PW91k     | -35                  | -36                  | -14                  |
| PBE/PBE/PW91k     | -24                  | -25                  | -9                   |
| PBE0/PBE/PW91k    | -12                  | -13                  | -7                   |

**Table S-VIII:** Magnetic exchange coupling constants calculated for the SAXPOW06 dimer from the sum-of isolated monomer (spin) densities using the accurate  $T_s$  from supersystem orbitals.

|                   | LDA                  | PBE                  | PBE0                 |
|-------------------|----------------------|----------------------|----------------------|
|                   | $J / \text{cm}^{-1}$ | $J / \text{cm}^{-1}$ | $J / \text{cm}^{-1}$ |
| Subsystem basis   |                      |                      |                      |
| Isolated, LDA     | -21                  | -21                  | -8                   |
| Isolated, PBE     | -17                  | -17                  | -6                   |
| Isolated, PBE0    | -12                  | -12                  | -7                   |
| Supersystem basis |                      |                      |                      |
| Isolated, LDA     | -25                  | -25                  | -8                   |
| Isolated, PBE     | -19                  | -19                  | -7                   |
| Isolated, PBE0    | -13                  | -13                  | -7                   |
